# Supplementary material
Source: publisher figshare collection journal article supplement (https://aacr.figshare.com/articles/dataset/_/22469912)

# Figure S2

## A Training cohort

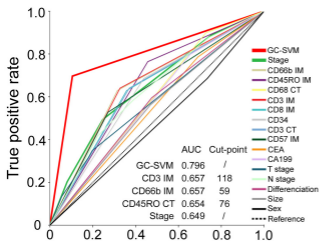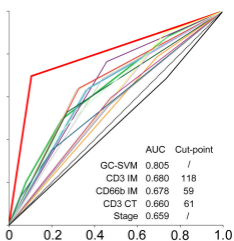

## B Internal validation cohort

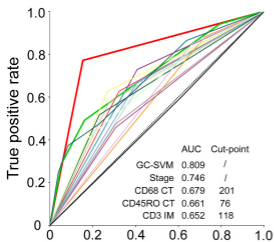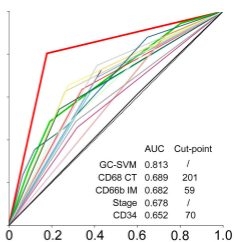

## C External validation cohort

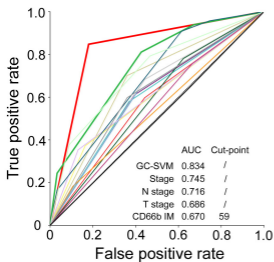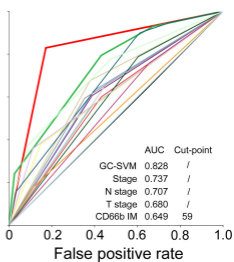

Supplement: Supplementary file 1 [file 39921398]
